# Supplementary material
Source: PubMed Central journal article supplement (PMC3302359)

Online Supplemental Material

**Table S1.**

Neural responsivity to milkshake receipt (n=151)<sup>1,2</sup>

|                   |   | <i>x, y, z</i> | <i>k</i> | Peak <i>Z</i> value | Peak <i>r</i> |
|-------------------|---|----------------|----------|---------------------|---------------|
| Postcentral gyrus | R | 45, -13, 37    | 14,609   | Inf <sup>3</sup>    | > 0.90        |
|                   | L | -51, -13, 28   |          | Inf                 | > 0.90        |
|                   | L | -48, -16, 31   |          | Inf                 | > 0.90        |
| dlPFC             | R | 39, 41, 31     | 21       | 4.88                | 0.39          |
|                   | R | 42, 44, 22     |          | 3.61                | 0.29          |
|                   | R | 30, 53, 25     |          | 3.37                | 0.27          |
| Cingulate         | L | -12, -16, 40   | 22       | 4.09                | 0.33          |
|                   | L | -18, -31, -40  |          | 3.77                | 0.31          |

<sup>1</sup> Significant at  $P < 0.05$  whole brain corrected for multiple comparisons

<sup>2</sup> Milkshake receipt > tasteless solution receipt contrast

<sup>3</sup> T-value = 16.13

Abbreviations - dlPFC = dorsolateral prefrontal cortex, *k* = cluster size, L = left hemisphere, R = right hemisphere

**Table S2.**

Pearson's correlations among consumption of energy dense foods (n = 151)

|                                   | Ice cream<br>consumption | Chocolate<br>candy<br>consumption | Cakes/cookie<br>consumption | Hamburger<br>consumption | French fry<br>consumption |
|-----------------------------------|--------------------------|-----------------------------------|-----------------------------|--------------------------|---------------------------|
| Ice cream<br>consumption          | -                        | 0.37*                             | 0.30*                       | 0.17*                    | 0.14                      |
| Chocolate<br>candy<br>consumption |                          | -                                 | 0.48*                       | 0.21*                    | 0.26*                     |
| Cakes/cookie<br>consumption       |                          |                                   | -                           | 0.24*                    | 0.25*                     |
| Hamburger<br>consumption          |                          |                                   |                             | -                        | 0.54*                     |

\*  $P < 0.05$

**Figure S1.**

Widespread activation in response to milkshake receipt (milkshake receipt > tasteless solution receipt contrast). Both the sagittal (upper left) and coronal (lower right) views are presented and color bars indicate the *T*-value of the activation. Additional information can be seen in Table S1.

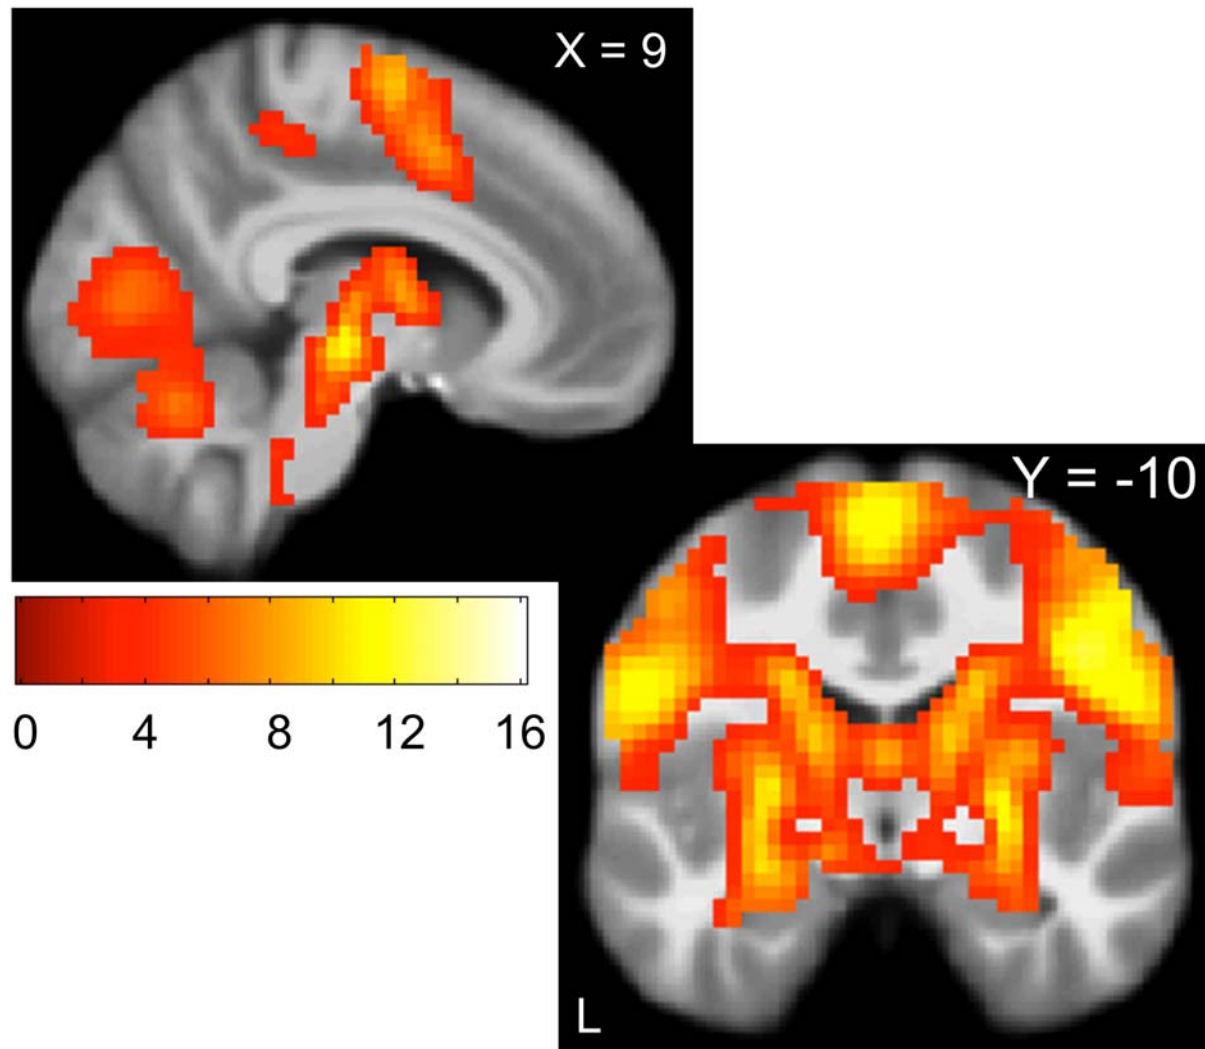

**Figure S2.**

Reduced striatal responsivity to milkshake receipt as a function of ice cream consumption (tasteless solution receipt > milkshake receipt). Participants frequency of ice cream intake was associated with reduced responsivity to milkshake receipt in **A)** the bilateral dorsolateral prefrontal cortex (dlPFC; squares; **axial and coronal views**) and anterior cingulate cortex (ACC; circles; **coronal and sagittal views**) and the **B)** right insula (circles; **axial and coronal views**). Color bars indicate the *T*-value of the activation presented. Additional detail can be seen Table 1.

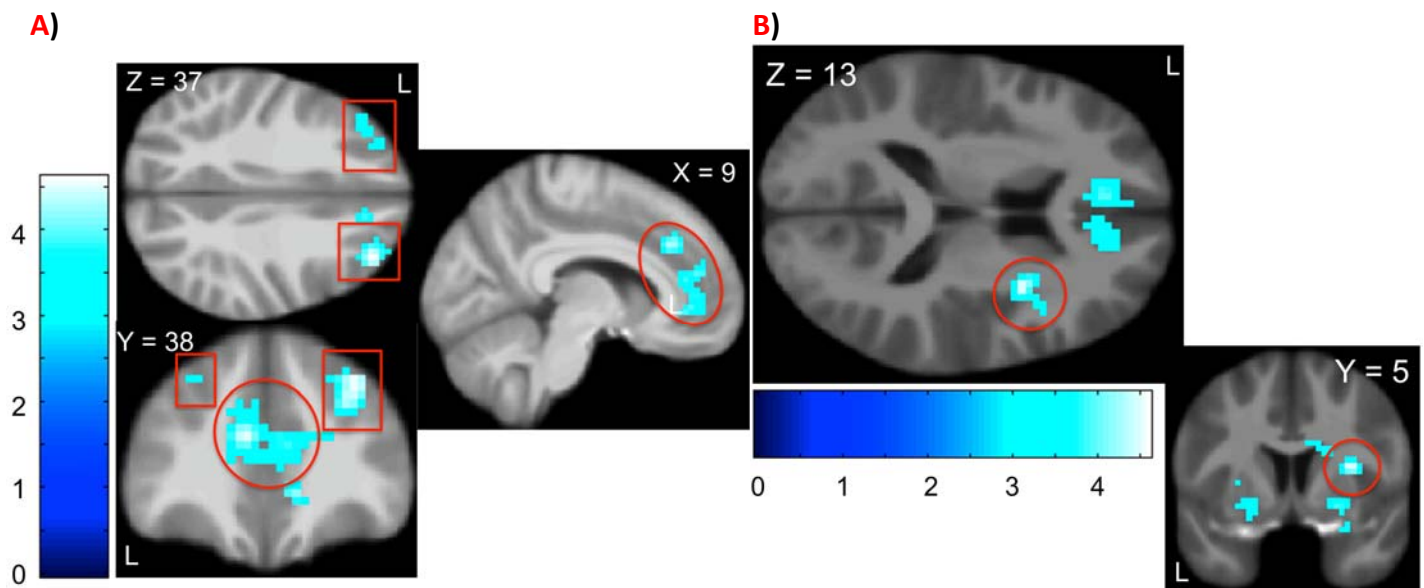

Supplement: supp_95.4.810_ajcn027003-T1-2_F1-2.pdf [file supp_95.4.810_ajcn027003-T1-2_F1-2.pdf]
